# Supplementary material for: Sequence Capture of Mitochondrial Genome with PCR-Generated Baits Provides New Insights into the Biogeography of the Genus Abies Mill.
Source: MDPI journal article supplement (doi:10.3390/plants11060762), 2022-03-13
Supplement: s1 [file s1]

## Supplementary materials for:

Sequence capture of mitochondrial genome with PCR - generated baits provide new insights in the biogeography of the genus *Abies*.

### Table of Contents:

|                                                                                                                                                                                  |                |
|----------------------------------------------------------------------------------------------------------------------------------------------------------------------------------|----------------|
| <b>Laboratory Protocols</b>                                                                                                                                                      | <b>Page 2</b>  |
| <b>Table S1. List of samples used for experiments</b>                                                                                                                            | <b>Page 17</b> |
| <b>Table S2. Position of coding regions on alignment and its representation among samples</b>                                                                                    | <b>Page 21</b> |
| <b>Table S3. Average nucleotide difference (below a diagonal) and average proportion of indel differences (above a diagonal) among the selected groups of firs (see M&amp;M)</b> | <b>Page 22</b> |
| <b>Figure S1. Maximum parsimony tree of mitochondrial haplotypes of <i>Abies</i></b>                                                                                             | <b>Page 24</b> |

# Laboratory Protocols

## Preparing of baits

Target-enrichment strategies (Mamanova et al., 2010) were used to enrich NGS libraries with mitochondrial DNA. For this purpose, PCR amplified fragments of *Abies sibirica* mitochondrial DNA were used as baits. To reduce the cost and complexity of baits design, long-range PCR was employed, allowing the minimum number of primers and PCR reactions. The assembly of reads of the whole genome sequencing of *A. sibirica*, with the selection of contigs, corresponding to plant mitochondrial DNA (according to BLAST search) having the total length of about 800,000 bp was used as a template to design PCR primers.

The primers were designed using Primer3 program (Untergasser et al., 2012). Preliminary research indicated that stable amplification with a good yield of PCR product is achieved with a fragment length of up to 10,000 bp. While designing the primers, the GC content was set to at least 40%, the length of the primers was 24 bp. (see below).

## Oligonucleotides used for LongAmp PCR

| Contig of<br><i>A. sibirica</i><br>mtDNA<br>assembly | Forward | Position<br>on contig | sequence                  | Reverse | Position<br>on contig | sequence                 |
|------------------------------------------------------|---------|-----------------------|---------------------------|---------|-----------------------|--------------------------|
| <b>1contig</b>                                       | 1A1F    | 632                   | CTCTCCCACACCAGAGAAGC      | 1A1R    | 11541                 | CCCTCAGATTGGGAAAGACA     |
|                                                      | 1A2F    | 11123                 | GCGGAGAATGTAAGCTCTGG      | 1A2R    | 22293                 | AATCCCCTGGGTAATTCGAC     |
|                                                      | 1A3F    | 21970                 | ATGCTTTGGTCGGTTAGGTG      | 1A3R    | 33241                 | TGAGAAATCCCTCCATTTTCG    |
| <b>2contig</b>                                       | 2A1F    | 428                   | GGGGAGCTGTAAAAGGAAGG      | 2A1R    | 12162                 | GGTCAACCAAATGTCCCATC     |
|                                                      | 2A2F    | 12142                 | GGATGGGACATTTGGTTGAC      | 2A2R    | 24022                 | CTCGAATAGCCGAGGACTTG     |
|                                                      | 2A3F    | 23766                 | CTGGCTCCACCAGGTGTATT      | 2A3R    | 35621                 | ATCTCCGCTTCAAAAAGCAAA    |
|                                                      | 2A4F    | 35444                 | GAGTCTCCGAAGGCACTGTC      | 2A4R    | 46193                 | AATAAATCCCTTCCCCGATG     |
|                                                      | 2A5F    | 44572                 | TTTTACTGGGCCTGGAAATG      | 2A5R    | 56531                 | GTAGCAACGAGGGAAAGCAG     |
|                                                      | 2A6F    | 56478                 | CCTGCCTGGTAACATGGACT      | 2A6R    | 67098                 | TTGTCTGTCGCATTTGCTTC     |
|                                                      | 2A7F    | 66702                 | TTTATGCATGCGAACAGAGC      | 2A7R    | 79316                 | GAGCTTGGTGCTTGGTCTTC     |
| <b>3contig</b>                                       | 3A1F    | 613                   | ATTATTGCTACGCCGACCAC      | 3A1R    | 11460                 | TGTGACAACCGGAGTACCAA     |
|                                                      | 3A2F    | 10824                 | GCAGCCAACCCCTTGTAAATA     | 3A2R    | 22175                 | TGGCAGTGACTTCGTGAAAG     |
|                                                      | 3A3F    | 21983                 | TTTAAGCCGAGGGAAGGAAT      | 3A3R    | 33282                 | CATGCTCTTGCTTGTTTGA      |
|                                                      | 3A4F    | 33261                 | CATCCAAACAAGCAAGAGCA      | 3A4R    | 45251                 | CGTCAAAGTGGTGGATGTTG     |
|                                                      | 3A5F    | 44445                 | GGAGCTGGCCCTTAGCTACT      | 3A5R    | 55425                 | GGACGTATCGATGCGAGTTT     |
|                                                      | 3A6F    | 55021                 | CCGCCAAACAAACTACGAT       | 3A6R    | 66650                 | GCTTTGATGGCGCTTAGAAC     |
|                                                      | 3A7F    | 65773                 | CATTAGGCGAGTCTGGCTTC      | 3A7R    | 77416                 | AGAAAGGGGAATGGGAGAGA     |
|                                                      | 3A8F    | 76145                 | CTCAGAACGACGGGAAGAAG      | 3A8R    | 88000                 | GCATTTTGGTTTCGATCGTT     |
|                                                      | 3A9F    | 86644                 | TTTTCCCATGATCGAAGAGG      | 3A9R    | 98493                 | AGGAACGTAGTCGCGAAGAA     |
|                                                      | 3A10F   | 97380                 | CTCGAACCCCATACCCCTAT      | 3A10R   | 108665                | CTTCGGTTGTTCCATGTGTG     |
|                                                      | 3A11F   | 108410                | GCTGAGCCAAAACCAGCTAC      | 3A11R   | 119939                | CAGAGCGAGCATTTCCTTACC    |
|                                                      | 3A12F   | 118883                | TGGATCTAACCCTTGCCTTG      | 3A12R   | 130382                | TTGCTTTCAGTCCTCACACG     |
| <b>4contig</b>                                       | 4A1F    | 1245                  | AAGTCCCGGGCTTTAACTGT      | 4A1R2   | 10595                 | TAGATCCTTGCTCGCACCTT     |
|                                                      | 4A1F2   | 10226                 | TGAAGCCAGCCTTTCATCT       | 4A1R    | 20939                 | CCTGTAAGTCCGAAACCAT      |
|                                                      | 4A2F    | 20639                 | CGTAGGTATGCGGAACCTGT      | 4A2R2   | 28685                 | CCAAGTCCGCTTATCTCTCG     |
|                                                      | 4A2F2   | 28595                 | GGGATCACACGACTGACCTT      | 4A2R    | 39092                 | AAGACAGGAGCAGCCAAAAA     |
|                                                      | 4A3F    | 35194                 | CCACCGCCTAAAGTGATTGT      | 4A3R2   | 43045                 | ATTTGTAGGGCGAGGTGTG      |
|                                                      | 4A3F2   | 40931                 | TCAGACGACTCGTTCAGGTG      | 4A3R    | 51166                 | GGTGTCGAACGTGATTTGTG     |
|                                                      | 4A4F    | 51124                 | TCTCATTTAGCCGCTTGCTTTCAC  | 4A4R    | 64382                 | ACACCTGGAGCTGCTAAACTTGTG |
|                                                      | 4A5F    | 62062                 | CCTAGTGGTTTAAAGCACCCGTACC | 4A5R    | 75583                 | ATCTACGTTGCACAAATTCCTCA  |
|                                                      | 4A6F    | 72220                 | AATTGGGTCAACATCTGGTGAAGA  | 4A6R    | 86086                 | ATGTCGCTTGCTTATTCACCTGC  |

|                  |       |        |                           |       |        |                            |
|------------------|-------|--------|---------------------------|-------|--------|----------------------------|
|                  | 4A7F  | 83096  | AGAACTGCCTCATCACCATAGCAG  | 4A7R  | 98016  | ATGTTTGTAGTCAATGCCGCTTGT   |
|                  | 4A8F  | 93641  | ATCTAATGGTTTTGGATGGCTCGT  | 4A8R  | 107904 | AGCCGTATGAAGTGGGTTTTTCATT  |
|                  | 4A9F  | 107432 | GTGGTCCCCTGTTCCAAGTGTATC  | 4A9R  | 117580 | ATCAATACCCGGCAGCAGAGTAAA   |
|                  | 4A10F | 116148 | AAAGTGTTTCATCCGCCCTAGCATA | 4A10R | 127824 | ATTACCTGATACTACGCGGGCTCA   |
|                  | 4A11F | 127800 | ATGAGCCCGCGTAGTATCAGGTAA  | 4A11R | 138765 | TAATATGCGACCGAAGGGAGCTAA   |
|                  | 4A12F | 138538 | TCCTTCCTGTCCTACCGATAACCA  | 4A12R | 149991 | GCAGACACAAAGTTCGCCTAGACA   |
|                  | 4A13F | 149670 | CCACTAGGCATTGTCTCACCACAC  | 4A13R | 160909 | TTGTTTCAGGTTCCCTCGGTTCTCTC |
| <b>5 contig</b>  | 5A1F  | 688    | ACCAAGAACACAGCACAGAACGAC  | 5A1R  | 10608  | TAAAGGCTCCCTCCTCTGAAATCC   |
|                  | 5A2F  | 10451  | ATGCCCCACACTTACTCGTCGTAT  | 5A2R  | 21273  | TATTTCTATGTCCCGAGGGGAGGT   |
|                  | 5A3F  | 21249  | TACCTCCCCTCGGGACATAGAAAT  | 5A3R  | 33137  | ACCTCCTTATACCGGAAACCTCA    |
|                  | 5A4F  | 31277  | TACCAAGCCGAACATGGTTGTATG  | 5A4R  | 42140  | TTAGGATCGTTCCCATAGCTCCA    |
| <b>6 contig</b>  | 6A1F  | 303    | GCCCCAGTTAGTTGTTTCGCTATTG | 6A1R  | 11478  | ACCTTCGGAATACCCCTACAAGGA   |
|                  | 6A2F  | 9987   | TCCACGGGATAAATAGAAGGAGCA  | 6A2R  | 20663  | ACACCGTCCCGAGAAGAACAATAA   |
| <b>7 contig</b>  | 7A1F  | 221    | CGCAGTAAAGGTACCCACTTTTCG  | 7A1R  | 11991  | TAGCTTTGGGATCCTACGATGGAA   |
|                  | 7A2F  | 11506  | CGGGTTCTTAATGGATGGATGGTA  | 7A2R  | 22614  | TACAACCTCCCCTCCCCTTTTGTT   |
|                  | 7A3F  | 22537  | AAGGGCGTATGCCTGAAACCTTAT  | 7A3R  | 33161  | GTGGAGACAGATCCAGGAAGCAAT   |
|                  | 7A4F  | 31436  | GGTATCACCTTACTGCTGGCTGCT  | 7A4R  | 43392  | TTATGATACCCGGGAGCACATACC   |
|                  | 7A5F  | 42390  | GTGCCATAATAATGCCCACTT     | 7A5R  | 54296  | CACTCAAGGTGCCTGTCTGTAGGA   |
|                  | 7A6F  | 53610  | CCTTCTTCCATTCCCATCTTTGTG  | 7A7R  | 65515  | GATTCAGGAATTTGAACCCACTGC   |
|                  | 7A7F  | 61773  | CGTGGATGCGGTATACTGGGTAAT  | 7A7R  | 72223  | GTCTCGAGTTCGCTTCTTCTCCAC   |
| <b>8 contig</b>  | 8A1F  | 792    | ACCGGATTCTACTCGAACAATGA   | 8A1R  | 11338  | TGCTGCGAAAGTGACCATCTCTAC   |
|                  | 8A2F  | 11132  | CCTATAGCCACGCAGCTTTTTACG  | 8A2R  | 21156  | GGGGCTTCCTTCGGTAACTAGAGA   |
| <b>9 contig</b>  | 9A1F  | 533    | TTCGTTCCGGTAGAGCTGTAGAGG  | 9A1R  | 11470  | CCCTTGAACCCAATCATCTACTCG   |
|                  | 9A2F  | 10854  | GGGAGAGGCACTTGTTCTTGTTGT  | 9A2R  | 22358  | GGTATATGCGGTCCTACCAACCAA   |
|                  | 9A3F  | 20394  | GCCTTATATTCTCGGCCAGTGTTG  | 9A3R  | 32200  | GAGCTTTACGGTCCCTCCCTAAGA   |
|                  | 9A4F  | 31939  | TAGGGTTTCTTCAGGGGTTTGTT   | 9A4R  | 43852  | ATGCCGCACCCAGAGAATATAAGA   |
|                  | 9A5F  | 42988  | AGGCAGTAGTTCCTAAGGCCGTTT  | 9A5R  | 53134  | AGCGAGGTTACCGCATAGTGAGAC   |
|                  | 9A6F  | 50191  | CGTAAGCAAGCAGTTCATCCAATG  | 9A6R  | 57556  | CTGGGCTAATCAGAGGAGGGATCT   |
| <b>10 contig</b> | 10A1F | 728    | TTTCCCTTGCTACCTTACGTGCAT  | 10A1R | 10375  | GGTGTGATAGGCAGGCGTTTTAAG   |
|                  | 10A2F | 9520   | GTTATCTCCTGGCTAGCGCTCGTA  | 10A2R | 20414  | ACCACTCCGGTCTCTCTCATATCG   |
|                  | 10A3F | 19357  | ATCGGATTCCCTCTGAGACTGATG  | 10A3R | 30813  | ACAGTGAAGAAGCCACCCAAGAAC   |
|                  | 10A4F | 30525  | TTACACTCCCTGCTGATGCGTTTA  | 10A4R | 40180  | GAAAGCAAGCCAGCAGGTTTAGAA   |
| <b>11 contig</b> | 11A1F | 165    | GTCATCTTGAGCCCTCCTGTTTGT  | 11A1R | 10232  | TTGCGCTAAGAAAGGTCTGTCTTG   |
|                  | 11A2F | 8405   | GGGTTTGTTCGACGGTACAGAG    | 11A2R | 20268  | ACGTGCAATACCATCTCCAAGTGA   |
| <b>12 contig</b> | 12A1F | 308    | CGGGAGTCATTCCAGATGAGAGAT  | 12A1R | 10728  | TACACCATTTCGTGCAGGTATTTGG  |
|                  | 12A2F | 9991   | CCCCAACGAAACAAAGAGTACAGG  | 12A2R | 21902  | GACTCCAATGTCTGCCTTCAGGTT   |
| <b>13 contig</b> | 13A1F | 349    | TAAGGGAATGATAGTTCGCCTGGA  | 13A1R | 10094  | GGTTATTTGGACACGCACGGTATT   |

|                  |       |       |                          |       |       |                           |
|------------------|-------|-------|--------------------------|-------|-------|---------------------------|
|                  | 13A2F | 9153  | CGGCTATCCAGCCAAACTTACAAC | 13A2R | 20716 | GATCCTGATCTTGCCTGAACACCT  |
|                  | 13A3F | 19009 | TAGAGGAATTCCCACCTGATCCAA | 13A3R | 30143 | GCCGCAGAACCAATAAAAACTGAC  |
|                  | 13A4F | 29423 | ATCGATCGGACTCTGCGACTAAAC | 13A4R | 40796 | AGAAATATGGTGCCTAGGTTGGA   |
|                  | 13A5F | 40286 | TGCTCTCCCGTCCATTTCTCTAAG | 13A5R | 51361 | GACCTAAAAGCTGGCCTCCAAACT  |
| <b>14 contig</b> | 14A1F | 606   | TGTTTGACTGCTCAATCTGCTTCC | 14A1R | 12374 | TCTCCTTTTGGGGGATATGGAAC   |
|                  | 14A2F | 11141 | AAGGAGATCCAAAAGGGCTCGTAG | 14A2R | 22381 | AACTGAACGCGGTGTAACCAAAC   |
| <b>15 contig</b> | 15A1F | 94    | ATCCCCGTCTTAGCTTATGCCATT | 15A1R | 11358 | TCTACCAACCAGTCAGCAAGCAAG  |
|                  | 15A2F | 10245 | GCTAAGCTCCTTCAGATCCCCAAT | 15A2R | 21005 | AGACGAAGGCACCACTCTACAACC  |
|                  | 15A3F | 20461 | TGTGTTGGGTCTCATGGATCAAGT | 15A3R | 28004 | GATCTAGTCTGCTGGGACGGTCAT  |
| <b>16 contig</b> | 16A1F | 680   | TATTACCTCACGGGGAAGGGTTCT | 16A1R | 12223 | TCCGACTTACCCTCATTACCCTCA  |
|                  | 16A2F | 11425 | AGGAAGTGTTTGACTTCGGTGAG  | 16A2R | 23272 | GGTGTTTGAATTAGGATCGCTTCG  |
| <b>17 contig</b> | 17A1F | 412   | GAGTTGCGCATATTGCTGTTTCAC | 17A1R | 11000 | AAGGGTAAGGTTGGCCAGTCAAAT  |
|                  | 17A2F | 9557  | TCAGGGTAGTCCCGGGAAAGTAAT | 17A2R | 21568 | AAGTGTAAGGTCGGACTTGGTCAGC |
| <b>18 contig</b> | 18A1F | 482   | CGGCCTATATCCCTACCAATGTGA | 18A1R | 10334 | ATAAAGCAACGGAGACATGGGCTA  |

Other oligonucleotides used for the preparation of baits, libraries, hybrid capture and re-amplification of libraries.

| Oligonucleotide and its purpose                            | Sequence                                                                      |
|------------------------------------------------------------|-------------------------------------------------------------------------------|
| Adapter oligos and primer for baits preparation            |                                                                               |
| Adapter1:                                                  | 5'-Phos-GAAGCTTGAATTCGAGCAGTCAG-3'                                            |
| Adapter2:                                                  | 5'-CTGCTCGAATTCAAGCTTCT-3'                                                    |
| Bio-bait:                                                  | TEG-Bio-CTGCTCGAATTCAAGCTTCT                                                  |
| Adapter oligos and primers for genomic library preparation |                                                                               |
| NEBNextad1                                                 | 5Phos/GATCGGAAGAGCACACGTCTGAACTCCAGT                                          |
| NEBNextad2                                                 | ACACTCTTTCCCTACACGACGCTCTTCCGATCT                                             |
| Indexed primers                                            |                                                                               |
| <b>NEBNext i501 Primer</b>                                 | 5'-AATGATACGGCGACCACCGAGATCTACACTATAGCCTACACTCTTTCCCTACACGACGCTCTTCCGATC*T-3' |
| <b>NEBNext i502 Primer</b>                                 | 5'-AATGATACGGCGACCACCGAGATCTACACATAGAGGCACACTCTTTCCCTACACGACGCTCTTCCGATC*T-3' |
| <b>NEBNext i503 Primer</b>                                 | 5'-AATGATACGGCGACCACCGAGATCTACACCCTATCCTACACTCTTTCCCTACACGACGCTCTTCCGATC*T-3' |
| <b>NEBNext i504 Primer</b>                                 | 5'-AATGATACGGCGACCACCGAGATCTACACGGCTCTGAACACTCTTTCCCTACACGACGCTCTTCCGATC*T-3' |
| <b>NEBNext i505 Primer</b>                                 | 5'-AATGATACGGCGACCACCGAGATCTACACAGGCGAAGACACTCTTTCCCTACACGACGCTCTTCCGATC*T-3' |
| <b>NEBNext i506 Primer</b>                                 | 5'-AATGATACGGCGACCACCGAGATCTACACTAATCTTAACACTCTTTCCCTACACGACGCTCTTCCGATC*T-3' |

|                                                                                         |                                                                                 |
|-----------------------------------------------------------------------------------------|---------------------------------------------------------------------------------|
| <b>NEBNext i507 Primer</b>                                                              | 5'-AATGATACGGCGACCACCGAGATCTACACCAGGACGTACACTCTTTCCCTACACGACGCTCTTCCGATC*T-3'   |
| <b>NEBNext i508 Primer</b>                                                              | 5'-AATGATACGGCGACCACCGAGATCTACACGTACTGACACACTCTTTCCCTACACGACGCTCTTCCGATC*T-3'   |
| <b>NEBNext i509 Primer</b>                                                              | 5'-AATGATACGGCGACCACCGAGATCTACACTTGCTTGACACACTCTTTCCCTA CACGACGCTCTTCCGATC*T-3' |
| <b>NEBNext i510 Primer</b>                                                              | 5'-AATGATACGGCGACCACCGAGATCTACACGAGAGGTTACACTCTTTCCCTA CACGACGCTCTTCCGATC*T-3'  |
| <b>NEBNext i511 Primer</b>                                                              | 5'-AATGATACGGCGACCACCGAGATCTACACACCTGGTTACACTCTTTCCCTA CACGACGCTCTTCCGATC*T-3'  |
| <b>NEBNext i512 Primer</b>                                                              | 5'-AATGATACGGCGACCACCGAGATCTACACAAGCGGAAACACTCTTTCCCTA CACGACGCTCTTCCGATC*T-3'  |
| <b>NEBNext i701 Primer</b>                                                              | 5'-CAAGCAGAAGACGGCATAACGAGATCGAGTAATGTGACTGGAGTTCAGACGTGTGCTCTTCCGATC*T-3'      |
| <b>NEBNext i702 Primer</b>                                                              | 5'-CAAGCAGAAGACGGCATAACGAGATTCTCCGGAGTGACTGGAGTTCAGACGTGTGCTCTTCCGATC*T-3'      |
| <b>NEBNext i703 Primer</b>                                                              | 5'-CAAGCAGAAGACGGCATAACGAGATAATGAGCGGTGACTGGAGTTCAGACGTGTGCTCTTCCGATC*T-3'      |
| <b>NEBNext i704 Primer</b>                                                              | 5'-CAAGCAGAAGACGGCATAACGAGATGGAATCTCGTGACTGGAGTTCAGACGTGTGCTCTTCCGATC*T-3'      |
| <b>NEBNext i705 Primer</b>                                                              | 5'-CAAGCAGAAGACGGCATAACGAGATTTCTGAATGTGACTGGAGTTCAGACGTGTGCTCTTCCGATC*T-3'      |
| <b>NEBNext i706 Primer</b>                                                              | 5'-CAAGCAGAAGACGGCATAACGAGATACGAATTCGTGACTGGAGTTCAGACGTGTGCTCTTCCGATC*T-3'      |
| <b>NEBNext i707 Primer</b>                                                              | 5'-CAAGCAGAAGACGGCATAACGAGATAGCTTCAGGTGACTGGAGTTCAGACGTGTGCTCTTCCGATC*T-3'      |
| <b>NEBNext i708 Primer</b>                                                              | 5'-CAAGCAGAAGACGGCATAACGAGATGCGCATTAGTGACTGGAGTTCAGACGTGTGCTCTTCCGATC*T-3'      |
| <b>NEBNext i709 Primer</b>                                                              | 5'-CAAGCAGAAGACGGCATAACGAGATCATAGCCGGTGACTGGAGTTCAGACGTGTGCTCTTCCGATC*T-3'      |
| <b>NEBNext i710 Primer</b>                                                              | 5'-CAAGCAGAAGACGGCATAACGAGATTTGCGGGAGTGACTGGAGTTCAGACGTGTGCTCTTCCGATC*T-3'      |
| <b>NEBNext i711 Primer</b>                                                              | 5'-CAAGCAGAAGACGGCATAACGAGATGCGCGAGAGTGACTGGAGTTCAGACGTGTGCTCTTCCGATC*T-3'      |
| <b>NEBNext i712 Primer</b>                                                              | 5'-CAAGCAGAAGACGGCATAACGAGATCTATCGCTGTGACTGGAGTTCAGACGTGTGCTCTTCCGATC*T-3'      |
| Oligos used for hybridization and for re-amplification of libraries after hybridization |                                                                                 |
| B1                                                                                      | AATGATACGGCGACCACCGAGATCTACACTCTTTCCCTACACGACGCTCTTCCGATCT-Pho                  |
| B2                                                                                      | AGATCGGAAGAGCGTCGTGTAGGGAAAGAGTGTAGATCTCGGTGGTGGCGGTATCATT-Pho                  |
| B3                                                                                      | AGATCGGAAGAGCACACGTCTGAACTCCAGTCAC-Pho                                          |
| B4                                                                                      | GTGACTGGAGTTCAGACGTGTGCTCTTCCGATCT-Pho                                          |
| B5                                                                                      | ATCTCGTATGCCGTCTTCTGCTTG-Pho                                                    |
| B6                                                                                      | CAAGCAGAAGACGGCATAACGAGAT-Pho                                                   |
| Sol bridge P5 (IS5_reamp.P5 )                                                           | AATGATACGGCGACCACCGA                                                            |
| Sol bridge P7 (IS6_reamp.P7 )                                                           | CAAGCAGAAGACGGCATAACGA                                                          |

PCR was performed using LongAmp® Taq DNA Polymerase (NEB, Ipswich, MA, USA) in 20  $\mu$ L containing

|                                       |              |
|---------------------------------------|--------------|
| H <sub>2</sub> O                      | 12.4 $\mu$ L |
| 5X LongAmp <i>Taq</i> Reaction Buffer | 4 $\mu$ L    |
| dNTPs (10 $\mu$ M)                    | 0.6 $\mu$ L  |
| forward primer (10 $\mu$ M)           | 0.8 $\mu$ L  |
| reverse primer (10 $\mu$ M)           | 0.8 $\mu$ L  |
| LongAmp <i>Taq</i> DNA Polymerase     | 0.4 $\mu$ L  |
| Template DNA                          | 1 $\mu$ L    |

Genomic DNA of *A. sibirica* with a concentration of 200 ng /  $\mu$ L obtained earlier (Semerikova et al., 2018) was used as a template. The PCR conditions were as following: an initial denaturation at 94° C for 30 s followed by 35 cycles of 94° C for 30 s, 65° C for 45 s (for 24-nucleotide primers, or 62° C for 20-nucleotide primers) and 65° C for 12 min with the final extension at 65° C for 10 min.

The quality and relative amount of the PCR product was assessed visually by electrophoresis of 5  $\mu$ L of the product conducted in 1% agarose gel in TAE buffer. Most of the fragments were amplified successfully and the product did not contain any substantial amount of non-specific amplification. The amount of the product was visually assessed by the intensity of the band (gradations 1, 2, 3, 4) and, depending on this assessment, when combined, the amount of this product was taken as 9, 6, 3, or 1.5 microliters. The total volume of the mixture was 250  $\mu$ L. PCR products were cleaned using the CleanMag kit (Evrogen, Moscow, Russia) as follows:

1. 250  $\mu$ L of a mixture of PCR products were combined with 0.7 volumes of magnetic particles previously resuspended and incubated for 0.5 h at room temperature (RT).
2. The tube was incubated for 10 min at RT.
3. Next, it was placed in a magnetic stand and after magnetic particles were collected (on one side of a tube) the supernatant was removed.
4. The magnetic particles were washed with 1 ml of 80% ethanol.
5. This washing step was repeated ones.
6. The remaining liquid was carefully removed and the particles were dried for 10 min under a fan.
7. Magnetic particles were resuspended in 125  $\mu$ L TE<sub>0.1</sub> and incubated for 5 min at RT, then the tube was placed in a magnetic stand, the supernatant was transferred to a new tube and the DNA concentration was measured. It was 260 ng/ $\mu$ L.

1. Before adding the fragmentase, mix it by knocking on the tube.
2. In a 0.2 ml PCR tube, mix the following:
3. 1.5 µg LongAmp PCR product 5.7 µL
4. 10X Fragmentase buffer v2 2 µL
5. H<sub>2</sub>O 10.3 µL
6. Fragmentase 2 µL

8. Quickly add 5  $\mu$ L EDTA (0.5 M) to the tube and place it on ice.

### Fractionation of the fragmentation products using CleanMag.

2. To remove short fragments, add 0.25 vol CleanMag (12.5  $\mu$ L), mix, incubate for 10 min at RT, place the tube in a magnetic stand and remove the supernatant. Rinse the magnetic particles with 200  $\mu$ L of 80% ethanol 2 times keeping the tube in the magnetic rack, remove the residual alcohol, **do not dry!**

4. Measure DNA concentration.

## End repair and A-tailing

In 0.2 ml PCR tube mix the following:

|                        |            |
|------------------------|------------|
| Adapter1 (100 $\mu$ M) | 20 $\mu$ L |
| Adapter2 (100 $\mu$ M) | 20 $\mu$ L |
| 10mM trisHCl pH 7.0    | 5 $\mu$ L  |
| 0.5 M NaCl             | 5 $\mu$ L  |



Total volume 50  $\mu$ L

Incubate the tube in PCR machine at 97° C for 2 min, 72 cycles of one min (97 ° C -1 ° C / cycle), at 25 °C for 5 min, 4 ° C  $\infty$

## 2. Prepare a mixture in three tubes:

10X buffer Y (330 mM Tris-Ac (pH 7.9 at 25 °C); 100 mM MgAc; 660 mM KAc; 10 mM DTT.) (SibEnzyme, Novosibirsk, Russia) 2  $\mu$ L

10 mM dNTPs 0.2  $\mu$ L

100  $\mu$ M ATP 0.2  $\mu$ L

T4 PNK (10u/ $\mu$ L SibEnzyme, Novosibirsk, Russia) 1  $\mu$ L

T4 DNA polymerase (5 u/ $\mu$ L SibEnzyme, Novosibirsk, Russia) 0.4  $\mu$ L

Taq polymerase (5 u/ $\mu$ L SibEnzyme, Novosibirsk, Russia) 0.2  $\mu$ L

Template 8  $\mu$ L

Total 20  $\mu$ L

Add 250 ng of DNA template to the first tube, H<sub>2</sub>O to the second one, and 250 ng of test DNA to the third one (any purified PCR product of about 200 bp). Incubate the tube in PCR machine with the following program: 30 min at 25 °C, 30 min at 72 °C, 10 min at 4 °C.

## 3. Add 36 $\mu$ L CleanMag (1.8 vol) to each of three tubes and clean as usual, **do not dry magnetic particles!**

## 4. Ligation of adapters

Prepare the mixture for each tube

10X T4 DNA ligase buffer 4  $\mu$ L

50% PEG-4000 4  $\mu$ L

40  $\mu$ M adapter 2.5  $\mu$ L

H<sub>2</sub>O 28.5  $\mu$ L

Total 39  $\mu$ L

Add the mixture (39  $\mu$ L) to each tube, then add 1  $\mu$ L T4 DNA ligase (2,000,000 ua/ml, SibEnzyme, Novosibirsk, Russia), mix, and incubate at 22 °C for 1 h. Add 40  $\mu$ L of CleanMag, clean the magnetic particles as usual, resuspend in 20  $\mu$ L H<sub>2</sub>O, incubate for 5 min at RT, and transfer the supernatant to clean tubes.

## 5 Amplification of baits

The products of the adapter ligation from the previous stage are used as templates. The baits are amplified in three tubes (for a higher yield), additionally, two other tubes contained as a template water or PCR product respectively.

Prepare the mixture for each of the five tubes:

|                                             |       |
|---------------------------------------------|-------|
| H <sub>2</sub> O                            | 33 µL |
| 10X Tersus Plus buffer                      | 5 µL  |
| dNTPS                                       | 1 µL  |
| primer bio-Baits (10 µM)                    | 5 µL  |
| Tersus polymerase (Evrogen, Moscow, Russia) | 1 µL  |
| Template                                    | 5 µL  |
| Total                                       | 50 µL |

The PCR program was as follows: 94 °C, 1 min; X cycles (94 °C, 10s; 60 °C, 15 s; 72 °C 40 s); 60 °C, 15s; 72 °C, 2 min; 4 °C, ∞. It is recommended to select the number of cycles X using RealTime PCR or a series of PCR reactions with a sequential increase in the number of cycles. In our case, 24 cycles were selected. Check the PCR product on 2% agarose gel. There should be no visible product in the sample containing water as a template whereas the sample with the test PCR fragment as a template should yield the PCR product the length of which is about two adapter lengths longer than the initial one. In the target sample, PCR products should have a length distribution with a maximum of about 400 bp. Combine the contents of the first three tubes, purify with 1.5 vol. CleanMag and wash the product off the magnetic particles with 100 µL TE<sub>0.1</sub>. Measure DNA concentration. In our case, it was 135 ng/µL. Store the baits at -20 °C.

## Preparing libraries

### 1. Preparation of adapters

In a 0.2 ml PCR tube mix the following:

|                      |       |
|----------------------|-------|
| NEBNextad1 (100 µM)  | 20 µL |
| NEBNextad2 (100 µM)  | 20 µL |
| 10 mM Tris-HCl, pH 7 | 5 µL  |
| 0.5 M NaCl           | 5 µL  |

Incubate in PCR machine with the following program: 97 °C, 2 min; 72 cycles (97 °C -1 ° C / cycle, 1 min).

Store at -20 °C.

## 2. Fragmentation of genomic DNA

Libraries are prepared from genomic DNA (see Supporting Information, Table S1) in small batches, in our case 16 or 32 libraries, in PCR strips. Approximately 300 ng of DNA is placed in each tube. Bring the volume to 8 µL with water, add 1 µL of 10 x ds Fragmentase buffer to all tubes. On ice add dsFragmentase to the tubes using a multichannel pipette and mix the content by pipetting. Then incubate strips in a PCR machine at 37 °C for 15 min. To stop the reaction, add 2.5 µL of 0.5 M EDTA to each tube and place the strips on ice.

## 3. Fractionation with CleanMag to obtain fragments with an average length of about 400 bp.

Add 37.5 µL H<sub>2</sub>O to each tube. Add 0.5 volume (25 µL) of CleanMag, mix, incubate for 10 min at RT, place tubes in a magnetic stand, and transfer the supernatant to clean tubes. Add 0.4 volume (20 µL) of CleanMag, mix, incubate for 10 min, place in a magnetic stand, remove supernatant, wash magnetic particles twice with 80% ethanol, do not dry.

## 4. End repair and A-tailing

Add 10 µL of the following mixture to each tube:

|                   |        |
|-------------------|--------|
| 10X buffer Y      | 1 µL   |
| 10 mM dNTPs       | 0.1 µL |
| 100mM ATP         | 0.1 µL |
| T4 PNK            | 0.5 µL |
| T4 DNA polymerase | 0.2 µL |
| Taq polymerase    | 0.1 µL |
| H <sub>2</sub> O  | 8 µL   |

Incubate in PCR machine at 25 °C, for 30 min; at 72 °C for 30 min.

Add 10 µL H<sub>2</sub>O, clean with 36 µL CleanMag, **do not dry!**

## 5. Ligation

Add to each tube 20 µL of the following mixture:

|                          |         |
|--------------------------|---------|
| 10X t4 DNA ligase buffer | 2 µL    |
| 5% PEG 4000              | 2 µL    |
| 40 µM adapter            | 1.25 µL |

|                  |          |
|------------------|----------|
| H <sub>2</sub> O | 14.25 µL |
| T4 ligase        | 0.5 µL   |

Mix, incubate at 22 °C for 1 h, clean with 36 µL of CleanMag. **Do not dry!**

## 6. Amplification with indexing primers.

Add to each tube 47 µL of PCR cocktail prepared in advance:

|                        |       |
|------------------------|-------|
| H <sub>2</sub> O       | 40 µL |
| 10X Tersus Plus buffer | 5 µL  |
| 10mM dNTPs             | 1 µL  |
| Tersus polymerase      | 1 µL  |

Then add respective indexed primers:

|                          |        |
|--------------------------|--------|
| NEBNext i50x Primer 10µM | 1.5 µL |
| NEBNext i7xx Primer 10µM | 1.5 µL |

Run the following PCR program: 94 °C, 1 min; X cycles (94 °C, 10 s; 60 °C, 15s; 72 °C, 40 s), 60 °C, 15s; 72 °C, 2 min; 4 °C, ∞.

The number of cycles X can be determined using RealTime PCR or a series of PCRs with different number of cycles within the range of 10 - 20 cycles. In our case, the number of cycles for the most of samples was 12.

Check PCR products on 2% agarose gel, purify PCR products using 1.8 vol CleanMag and dissolve in 20 µL H<sub>2</sub>O. Measure DNA concentration.

## Hybridization

1. Prepare the following mixture for each sample (in our case, multiply everything by 100):

|                   |        |
|-------------------|--------|
| Baits (135 ng/µL) | 0.7 µL |
| 2X BWT            | 2.5 µL |
| H <sub>2</sub> O  | 1.8 µL |
| Total             | 5 µL   |

Split the entire volume into several PCR tubes, 100  $\mu\text{L}$  per tube (5 tubes in our case).

2. Incubate at 95 °C for 5 min, transfer to ice.

3. Take 4  $\mu\text{L}$  multiplied by the number of samples (400  $\mu\text{L}$  in our case) of streptavidin coated magnetic particles (1  $\mu\text{g}/\mu\text{L}$ , Sileks, Moscow, Russia), mix with 1 ml 1X BWT, place in a magnetic stand, remove the supernatant.

4. Mix magnetic particles with 1 ml TET, place the tubes in a magnetic stand, remove supernatant.

5. Mix magnetic particles with baits from step 2.

6. Incubate the tubes at RT for 20 minutes.

7. Place the tubes in a magnetic stand, remove supernatant.

8. Wash magnetic particles with 1 ml 1X BWT at 65 °C, place the tubes in a magnetic stand, remove supernatant, and repeat washing step.

9. Mix magnetic particles with 125  $\mu\text{L}$  (1.25  $\mu\text{L}$  per tube) of TET and place the tubes on ice.

10. Prepare Library mix in PCR strips, in our case there were 12 strips. Add to each tube the following:

|                                                                                              |                     |
|----------------------------------------------------------------------------------------------|---------------------|
| Blocking DNA (freshly boiled herring testes DNA 2.5 $\mu\text{g}/\mu\text{L}$ , Sigma D6898) | 0.4 $\mu\text{L}$   |
| Blocking oligos B1-B6 (100 $\mu\text{M}$ ) 6 X                                               | 0.25 $\mu\text{L}$  |
| Library and H <sub>2</sub> O                                                                 | 4.725 $\mu\text{L}$ |
| Total                                                                                        | 6.625 $\mu\text{L}$ |

11. Prepare the HYB buffer (multiplied by the samples number)

|                         |                     |
|-------------------------|---------------------|
| 20X SSPE                | 3.125 $\mu\text{L}$ |
| EDTA (0.5M)             | 0.125 $\mu\text{L}$ |
| 50 x Denhard's solution | 1.25 $\mu\text{L}$  |
| 10% SDS                 | 0.125 $\mu\text{L}$ |
| Total                   | 4.625 $\mu\text{L}$ |

Prepare with some excess. In our case, 462.5  $\mu\text{L}$

12. Run the following program on two PCR machines: 95 °C, 5 min; 72 °C, 60s; 71 °C, 60 s; 70 °C, 60s; 69 °C, 60 s; 68 °C (incubation at 68 °C can be used for plant mtDNA, but for nuclear DNA or chloroplast DNA, 65 °C should be more appropriate),  $\infty$ .

13. Place the strips with Library mix in PCR machine # 1.

14. Mix HYB buffer (462.5  $\mu$ L) and magnetic particles (125  $\mu$ L). Split them into 8 tubes (73.4375  $\mu$ L per tube) in a PCR strip. When the temperature of the PCR block reaches 72 °C, place this strip in PCR machine # 2. Incubate for 5 min.

15. Open the strip with HYB buffer and magnetic particles mix and 4 strips with Library mix. Leave the rest of the Library mix strips closed. Resuspend the mix of HYB buffer and magnetic particles with a multichannel pipette and transfer 5.875  $\mu$ L of Library mix to each tube of 4 strips, mix and layer with 10  $\mu$ L of mineral oil. Close these 4 strips and start working with the next four ones etc.

16. Incubate strips with Library mix for 48 - 84 hours

17. Washing:

Add 200  $\mu$ L of 1X SSC, 0.1% SDS to each tube, incubate for 10 min at RT, carefully transfer the aqueous phase with magnetic particles to clean strips, avoiding oil trapping as much as possible. Place in a magnetic stand, and remove supernatant.

Add again 200 1X SSC, 0.1% SDS to each tube, incubate for 10 min at RT, place in a magnetic stand, remove the supernatant.

Add 200  $\mu$ L 0.1 X SSC, 0.1% SDS, incubate for 5 min in a PCR machine at 60 °C, remove the supernatant. Repeat this step.

Add 200  $\mu$ L 0.1 X SSC, 0.1% SDS, incubate for 5 min in a PCR machine at 65 °C, remove the supernatant.

To remove traces of salts and SDS, wash magnetic particles once with 200  $\mu$ L TE<sub>0.1</sub> at RT, remove supernatant. **Do not dry!**

18. Reamplification of libraries:

Add PCR cocktail (prepared in advance) to the tubes with magnetic particles

|                                 | Per 1 tube  |
|---------------------------------|-------------|
| H <sub>2</sub> O                | 40 $\mu$ L  |
| 10X Tersus Plus buffer          | 5 $\mu$ L   |
| dNTPs (10 mM)                   | 1 $\mu$ L   |
| primer Sol_bridge_P5 10 $\mu$ M | 1.5 $\mu$ L |
| primer Sol_bridge_P7 10 $\mu$ M | 1.5 $\mu$ L |
| tersus polymerase               | 1 $\mu$ L   |
| total                           | 50 $\mu$ L  |

PCR program: 94 °C, 1 min; 26 cycles (94 °C, 10 s; 60 °C, 15 s; 72 °C, 40 s); 60 °C, 15s; 72 °C, 2 min; 4 °C,  $\infty$ .

Check the PCR product by conducting electrophoresis of 5 µL in 2 % agarose gel.

Purify PCR products with CleanMag (0.9 volume to reduce the proportion of short fragments). Measure DNA concentration.

#### 19. Verification of the library enrichment by the mitochondrial DNA fragments

To check the enrichment, the PCR product of re-amplification from a part of the libraries (12 randomly taken) was ligated into the pGEM-T-Easy plasmid (Promega, Madison, WI, USA) and 2 colonies from each ligation were sequenced using the BigDye v 3.1 kit (Thermo Fisher Scientific). The sequences were blasted against the contigs, previously used for the development of hybridization baits and against GenBank database. In our case, eleven fragments matched the contigs used for development of baits and the Pinaceae mitochondrial sequences. One fragment was similar to *Gossypium kirkii* and the rest showed no significant match.

20. Reamplified libraries were mixed equimolarly. The quality of the pool of the libraries was checked with Agilent 2200 TapeStation System (Agilent, Santa Clara, CA, USA) and the sequencing was done with one line of Illumina NovaSeq 6000 SP paired end 2x150 bp in Evrogen, Moscow, Russia.

## RECIPIES

### BWT buffer (2X)

2 M NaCl

10 mM Tris-Cl, pH 8.0

1 mM EDTA, pH 8.0

0.1% Tween-20

### BWT buffer (1X)

BWT buffer (2X) diluted 2 times in water

### TET buffer

10 mM Tris-Cl, pH 8.0

1 mM EDTA, pH 8.0

0.05% Tween-20

TE<sub>0.1</sub>

10 mM Tris-Cl, pH 8.0

0.1 mM EDTA, pH 8.0

SSPE (20×, pH 7.4)

NaCl                      3M

NaH<sub>2</sub>PO<sub>4</sub> · H<sub>2</sub>O      0.2M

EDTA                      0.02M

H<sub>2</sub>O                        to 1 L

Adjust the pH to 7.4 with NaOH. Store at room temperature.

Denhardt's reagent (50X)

Ficoll 400                                      1% (w/v)

Polyvinylpyrrolidone (PVP)              1% (w/v)

Bovine serum albumin (Fraction V)      1% (w/v)

H<sub>2</sub>O                                              to 100 mL

20 X SSC

3M NaCl

0.3M Tris-sodium citrate

pH 7.0



**Table S1** List of samples used for experiments.

| sample No <sup>1</sup> | Species                                                     | Individual No <sup>3</sup> | Ratio of nucleotides read to alignment length | Indexing primer 1 | Indexing primer 2 | Sample information <sup>4</sup>       | Section <sup>5</sup>                           |
|------------------------|-------------------------------------------------------------|----------------------------|-----------------------------------------------|-------------------|-------------------|---------------------------------------|------------------------------------------------|
|                        | <i>Abies sibirica</i> <sup>2</sup>                          |                            | 0.99                                          |                   |                   |                                       | sect. <i>Balsamea</i>                          |
| 1                      | <i>A. sibirica</i> Ledeb.                                   | 4                          | 0.91                                          | i501              | i701              | 51°48' / 87°15' E<br>Is24-2007        | sect. <i>Balsamea</i>                          |
| 2                      | <i>A. sachalinensis</i> (F. Schmidt) Mast.                  | 1                          | 0.52                                          | i502              | i701              | 46°40' / 141°50' E<br>Is41-2008       | sect. <i>Balsamea</i>                          |
| 3                      | <i>A. nephrolepis</i> (Trautv. ex Maxim.) Maxim.            | 4                          | 0.86                                          | i503              | i701              | 48°15' / 134°40' E<br>Is04-2008       | sect. <i>Balsamea</i>                          |
| 4                      | <i>A. alba</i> Mill.                                        | 1                          | 0.53                                          | i504              | i701              | 47°48' / 13°02' E<br>Is6-2010         | sect. <i>Abies</i>                             |
| 5                      | <i>A. balsamea</i> (L.) Mill.                               | 3                          | 0.44                                          | i505              | i701              | MBG,<br>voucher A0718                 | sect. <i>Balsamea</i>                          |
| 6                      | <i>A. recurvata</i> Mast.                                   | 2                          | 0.67                                          | i506              | i701              | S,<br>Is15-2014                       | sect. <i>Momi</i>                              |
| 7                      | <i>A. mariesii</i> Mast.                                    | 4                          | 0.41                                          | i507              | i701              | 35°46' / 137°48' E<br>Is5n-2015       | sect. <i>Amabilis</i>                          |
| 8                      | <i>A. firma</i> Siebold & Zucc.                             | 4                          | 0.57                                          | i508              | i701              | 36°13' / 140°06' E<br>Is7n-2015       | sect. <i>Momi</i>                              |
| 9                      | <i>A. fargesii</i> Franch.                                  | 1                          | 0.91                                          | i501              | i702              | M,<br>voucher K09-13-062<br>Is28-2014 | sect. <i>Pseudopicea</i>                       |
| 10                     | <i>A. amabilis</i> Douglas ex J. Forbes                     | 2                          | 0.55                                          | i502              | i702              | M,<br>Is19-2014                       | sect. <i>Amabilis</i>                          |
| 11                     | <i>A. bracteata</i> (D. Don) A. Poit                        | 2                          | -                                             | i503              | i702              | NBG,<br>Is12-2011                     | sect. <i>Bracteata</i>                         |
| 12                     | <i>A. koreana</i> E. H. Wilson                              | 1                          | -                                             | i504              | i702              | MBG,<br>voucher A048<br>Is48-2013     | sect. <i>Balsamea</i>                          |
| 13                     | <i>A. pindrow</i> (Royle ex D. Don) Royle                   | 1                          | -                                             | i505              | i702              | 34°03' / 74°24' E<br>Is31-2013        | sect. <i>Momi</i>                              |
| 14                     | <i>A. concolor</i> (Gordon) Lindl. Ex Hildebr.              | 2                          | 0.50                                          | i506              | i702              | 37°45' / 119°30' W<br>Is13-2012       | sect. <i>Grandis</i>                           |
| 15                     | <i>A. magnifica</i> A. Murray                               | 1                          | -                                             | i507              | i702              | 37°45' / 119°30' W<br>Is16-2012       | sect. <i>Nobilis</i>                           |
| 16                     | <i>Keteleeria fortunei</i> (A. Murray) Carrière             |                            | -                                             | i508              | i702              | Is18-2017                             |                                                |
| 17                     | <i>A. sibirica</i>                                          | 1                          | 0.92                                          | i501              | i703              | 49°30' / 111°00' E<br>Is03-2007       | sect. <i>Balsamea</i>                          |
| 18                     | <i>A. sibirica</i>                                          | 5                          | 0.91                                          | i502              | i703              | 52°40' / 88°00' E<br>Is40-2006        | sect. <i>Balsamea</i>                          |
| 19                     | <i>A. semenovii</i> B. Fedtsch (synonym used in this study) | 2                          | 0.86                                          | i503              | i703              | 41°52' / 71°54' E<br>Is33-2010        | sect. <i>Balsamea</i>                          |
| 20                     | <i>A. nephrolepis</i>                                       | 2                          | 0.84                                          | i504              | i703              | 48°15' / 134°40' E<br>Is02-2008       | sect. <i>Balsamea</i><br>sect. <i>Balsamea</i> |
| 21                     | <i>A. nephrolepis</i>                                       | 1                          | 0.79                                          | i505              | i703              | 49°00' / 131°05' E                    | sect. <i>Balsamea</i>                          |

|    |                                                                                                     |   |      |      |      |                                            |                        |
|----|-----------------------------------------------------------------------------------------------------|---|------|------|------|--------------------------------------------|------------------------|
|    |                                                                                                     |   |      |      |      | E<br>Is01-2008                             |                        |
| 22 | <i>A. nephrolepis</i>                                                                               | 5 | 0.80 | i506 | i703 | 42°51'/130°49'<br>E<br>Is1n-2015           | sect. <i>Balsamea</i>  |
| 23 | <i>A. koreana</i>                                                                                   | 2 | 0.85 | i507 | i703 | M,<br>voucher G01-<br>76-1342<br>Is27-2014 | sect. <i>Balsamea</i>  |
| 24 | <i>A. alba</i>                                                                                      | 4 | 0.55 | i508 | i703 | 47°48'/ 13°02' E<br>Is8-2010               | sect. <i>Abies</i>     |
| 25 | <i>A. alba</i>                                                                                      | 5 | 0.39 | i501 | i704 | 49°35'/ 19°35' E<br>Is01-2019              | sect. <i>Abies</i>     |
| 26 | <i>A. cephalonica</i> Loudon                                                                        | 1 | 0.54 | i502 | i704 | B,<br>Is02-2011                            | sect. <i>Abies</i>     |
| 27 | <i>A. cephalonica</i>                                                                               | 3 | 0.47 | i503 | i704 | P,<br>Is20-2013                            | sect. <i>Abies</i>     |
| 28 | <i>A. nordmanniana</i><br>(Steven) Spach.                                                           | 4 | 0.55 | i504 | i704 | 43°22'/ 41°44' E<br>Is31-2014              | sect. <i>Abies</i>     |
| 29 | <i>A. nordmanniana</i>                                                                              | 1 | 0.51 | i505 | i704 | B,<br>Is04-2011                            | sect. <i>Abies</i>     |
| 30 | <i>A. nordmanniana</i>                                                                              | 3 | 0.41 | i506 | i704 | S,<br>Is12-2013                            | sect. <i>Abies</i>     |
| 31 | <i>A. nordmanniana</i> ssp.<br><i>equi-trojani</i> (Asch. &<br>Sint.ex Boiss.) Coode<br>&Cullen     | 1 | 0.56 | i507 | i704 | NBG,<br>Is13-2011                          | sect. <i>Abies</i>     |
| 32 | <i>A. nordmanniana</i> ssp.<br><i>equi-trojani</i>                                                  | 2 | -    | i508 | i704 | M,<br>Is23-2014                            | sect. <i>Abies</i>     |
| 33 | <i>A. nordmanniana</i> ssp.<br><i>equi-trojani</i> var.<br><i>bornmuelleriana</i><br>(Mattf.) Silba | 3 | 0.60 | i501 | i705 | M,<br>Is6-2014                             | sect. <i>Abies</i>     |
| 34 | <i>A. pinsapo</i> Boiss.                                                                            | 1 | 0.54 | i502 | i705 | NBG,<br>Is14-2011                          | sect. <i>Piceaster</i> |
| 35 | <i>A. pinsapo</i>                                                                                   | 3 | 0.53 | i503 | i705 | P,<br>Is18-2013                            | sect. <i>Piceaster</i> |
| 36 | <i>A. numidica</i> de Lannoy<br>ex Carriere                                                         | 2 | 0.57 | i504 | i705 | NBG,<br>Is9-2013                           | sect. <i>Piceaster</i> |
| 37 | <i>A. firma</i>                                                                                     | 5 | 0.65 | i505 | i705 | 36°13' / 140°06'<br>E<br>Is8n-2015         | sect. <i>Momi</i>      |
| 38 | <i>A. firma</i>                                                                                     | 1 | 0.73 | i506 | i705 | S,<br>Is20-2011                            | sect. <i>Momi</i>      |
| 39 | <i>A. firma</i>                                                                                     | 3 | 0.57 | i507 | i705 | S,<br>Is21-2011                            | sect. <i>Momi</i>      |
| 40 | <i>A. homolepis</i> Siebold &<br>Zucc.                                                              | 4 | 0.55 | i508 | i705 | 36°06' / 138°11'<br>E<br>Is13n-2015        | sect. <i>Momi</i>      |
| 41 | <i>A. homolepis</i>                                                                                 | 1 | 0.72 | i501 | i706 | MBG,<br>voucher A0571                      | sect. <i>Momi</i>      |
| 42 | <i>A. homolepis</i>                                                                                 | 3 | 0.72 | i502 | i706 | M,<br>Is25-2014                            | sect. <i>Momi</i>      |
| 43 | <i>A. holophylla</i> Maxim.                                                                         | 1 | 0.50 | i503 | i706 | 43°10'/ 132°00'<br>E<br>Is20-2006          | sect. <i>Momi</i>      |
| 44 | <i>A. holophylla</i>                                                                                | 3 | -    | i504 | i706 | 42°05'/ 128°04'<br>E<br>Is22-2013          | sect. <i>Momi</i>      |
| 45 | <i>A. veitchii</i> Lindl.                                                                           | 1 | -    | i505 | i706 | MBG,<br>voucher A0531                      | sect. <i>Balsamea</i>  |

|    |                                                                      |   |      |      |      |                                       |                        |
|----|----------------------------------------------------------------------|---|------|------|------|---------------------------------------|------------------------|
| 46 | <i>A. veitchii</i>                                                   | 7 | 0.51 | i506 | i706 | 35°46' / 137°50' E<br>Is14n-2015      | sect. <i>Balsamea</i>  |
| 47 | <i>A. veitchii</i>                                                   | 6 | 0.51 | i507 | i706 | M,<br>Is5-2014                        | sect. <i>Balsamea</i>  |
| 48 | <i>A. pindrow</i>                                                    | 2 | 0.52 | i508 | i706 | S,<br>Is14-2014                       | sect. <i>Momi</i>      |
| 49 | <i>A. cephalonica</i>                                                | 2 | 0.62 | i501 | i707 | NBG,<br>Is08-2013                     | sect. <i>Abies</i>     |
| 50 | <i>A. pinsapo</i>                                                    | 2 | 0.48 | i502 | i707 | C,<br>Is30-2011                       | sect. <i>Piceaster</i> |
| 51 | <i>A. cilicica</i> (Antoine & Kotschy) Carriere ssp. <i>cilicica</i> | 1 | 0.46 | i503 | i707 | Kew,<br>voucher 40673                 | sect. <i>Abies</i>     |
| 52 | <i>A. mariesii</i> .                                                 | 1 | 0.50 | i504 | i707 | M,<br>Is01m-2014                      | sect. <i>Amabilis</i>  |
| 53 | <i>A. mariesii</i>                                                   | 3 | 0.42 | i505 | i707 | 35°46' / 137°48' E<br>Is6n-2015       | sect. <i>Amabilis</i>  |
| 54 | <i>A. mariesii</i>                                                   | 2 | 0.46 | i506 | i707 | M,<br>voucher K09-91-132<br>Is12-2014 | sect. <i>Amabilis</i>  |
| 55 | <i>A. holophylla</i>                                                 | 2 | 0.87 | i507 | i707 | 43°10' / 132°00' E<br>Is22-2006       | sect. <i>Momi</i>      |
| 56 | <i>A. gracilis</i> Kom. (synonym used in this study)                 | 1 | 0.87 | i508 | i707 | 54°07' / 159°59' E<br>Is51-2010       | sect. <i>Balsamea</i>  |
| 57 | <i>A. sachalinensis</i>                                              | 3 | 0.57 | i501 | i708 | 46°40' / 143°10' E<br>Is32-2008       | sect. <i>Balsamea</i>  |
| 58 | <i>A. sachalinensis</i>                                              | 5 | 0.66 | i502 | i708 | 44°01' / 145°52' E<br>Is15-2008       | sect. <i>Balsamea</i>  |
| 59 | <i>A. balsamea</i>                                                   | 1 | 0.56 | i503 | i708 | MBG,<br>voucher A0712                 | sect. <i>Balsamea</i>  |
| 60 | <i>A. balsamea</i>                                                   | 4 | 0.57 | i504 | i708 | M,<br>Is9-2014                        | sect. <i>Balsamea</i>  |
| 61 | <i>A. balsamea</i> var. <i>phanerolepis</i> Fernald                  | 5 | 0.55 | i505 | i708 | B,<br>Is07-2011                       | sect. <i>Balsamea</i>  |
| 62 | <i>A. fraseri</i> (Pursh) Poir.                                      | 2 | 0.48 | i506 | i708 | MBG,<br>voucher A0477                 | sect. <i>Balsamea</i>  |
| 63 | <i>A. fraseri</i>                                                    | 3 | 0.61 | i507 | i708 | M,<br>voucher K09-99-143<br>Is8-2014  | sect. <i>Balsamea</i>  |
| 64 | <i>A. lasiocarpa</i> (Hook.) Nutt.                                   | 1 | 0.66 | i508 | i708 | MBG,<br>voucher A0520                 | sect. <i>Balsamea</i>  |
| 65 | <i>A. lasiocarpa</i>                                                 | 2 | 0.50 | i501 | i709 | M,<br>K09-97-442<br>Is2-2014          | sect. <i>Balsamea</i>  |
| 66 | <i>A. lasiocarpa</i> var. <i>arizonica</i> (Merriam) Lemmon          | 2 | 0.57 | i502 | i709 | B (Otradnoye)<br>Is03-2013            | sect. <i>Balsamea</i>  |
| 67 | <i>A. lasiocarpa</i> var. <i>arizonica</i>                           | 1 | 0.59 | i503 | i709 | B,<br>Is06-2011                       | sect. <i>Balsamea</i>  |
| 68 | <i>A. concolor</i>                                                   | 4 | 0.41 | i504 | i709 | 37°45' / 119°30' W<br>Is14-2012       | sect. <i>Grandis</i>   |
| 69 | <i>A. concolor</i>                                                   | 1 | 0.42 | i505 | i709 | B,<br>Is05-2011                       | sect. <i>Grandis</i>   |

|    |                                                 |   |      |      |      |                                           |                             |
|----|-------------------------------------------------|---|------|------|------|-------------------------------------------|-----------------------------|
| 70 | <i>A. religiosa</i> (Kunth)<br>Schltdl. & Cham. | 1 | 0.36 | i506 | i709 | Kew,<br>voucher 37361                     | sect. <i>Grandis</i>        |
| 71 | <i>A. vejarii</i> Martinez                      | 1 | 0.45 | i507 | i709 | Kew,<br>voucher 37359                     | sect. <i>Grandis</i>        |
| 72 | <i>A. grandis</i> (Douglas ex<br>D. Don) Lindl. | 3 | 0.49 | i508 | i709 | MBG,<br>Is21-2013                         | sect. <i>Grandis</i>        |
| 73 | <i>A. grandis</i>                               | 4 | 0.50 | i501 | i710 | M,<br>voucher K09-<br>03-135<br>Is17-2014 | sect. <i>Grandis</i>        |
| 74 | <i>A. amabilis</i>                              | 1 | -    | i502 | i710 | M,<br>Is1-2013                            | sect. <i>Amabilis</i>       |
| 75 | <i>A. amabilis</i>                              | 3 | 0.45 | i503 | i710 | M,<br>Is20-2014                           | sect. <i>Amabilis</i>       |
| 76 | <i>A. procera</i> Rehder                        | 1 | 0.55 | i504 | i710 | M,<br>voucher K09-<br>04-100<br>Is10-2014 | sect. <i>Nobilis</i>        |
| 77 | <i>A. procera</i>                               | 2 | 0.54 | i505 | i710 | M, K09-95-042<br>Is24-2014                | sect. <i>Nobilis</i>        |
| 78 | <i>A. magnifica</i>                             | 2 | 0.51 | i506 | i710 | 37°45' / 119°30'<br>W<br>Is17-2012        | sect. <i>Nobilis</i>        |
| 79 | <i>A. recurvata</i>                             | 1 | 0.28 | i507 | i710 | Kew,<br>voucher 36850                     | sect. <i>Momi</i>           |
| 80 | <i>A. forrestii</i> Coltm.-Rog.                 | 1 | 0.58 | i508 | i710 | Kew,<br>voucher 37134                     | sect.<br><i>Pseudopicea</i> |
| 81 | <i>A. grandis</i>                               | 1 | 0.59 | i501 | i711 | Kew,<br>voucher 40674                     | sect. <i>Grandis</i>        |
| 82 | <i>A. nordmanniana</i>                          | 2 | 0.59 | i502 | i711 | MBG,<br>voucher A480<br>Is25-2013         | sect. <i>Abies</i>          |
| 83 | <i>A. numidica</i>                              | 1 | 0.65 | i503 | i711 | Kew,<br>voucher 40675                     | sect. <i>Piceaster</i>      |
| 84 | <i>A. veitchii</i>                              | 2 | 0.48 | i504 | i711 | B,<br>Is10-2011                           | sect. <i>Balsamea</i>       |
| 85 | <i>A. spectabilis</i> (D. Don)<br>Spach.        | 1 | 0.45 | i505 | i711 | Kew,<br>voucher 37135                     | sect.<br><i>Pseudopicea</i> |
| 86 | <i>A. densa</i> Griff.                          | 1 | 0.60 | i506 | i711 | Kew,<br>voucher 37133                     | sect.<br><i>Pseudopicea</i> |
| 87 | <i>A. squamata</i> Mast.                        | 1 | 0.55 | i507 | i711 | Kew,<br>voucher 37136                     | sect.<br><i>Pseudopicea</i> |
| 88 | <i>A. delavayi</i> Franch.                      | 1 | 0.53 | i508 | i711 | Kew,<br>voucher 37132                     | sect.<br><i>Pseudopicea</i> |
| 89 | <i>A. gracilis</i>                              | 3 | 0.85 | i501 | i712 | MBG,<br>voucher 478<br>Is2-2013           | sect. <i>Balsamea</i>       |
| 90 | <i>A. sachalinensis</i>                         | 2 | 0.63 | i502 | i712 | 46°40'/141°50'<br>E<br>Is42-2008          | sect. <i>Balsamea</i>       |
| 91 | <i>A. semenovii</i>                             | 3 | 0.88 | i503 | i712 | 42°06' / 72°49' E<br>Is4-2012             | sect. <i>Balsamea</i>       |
| 92 | <i>A. balsamea</i>                              | 2 | 0.50 | i504 | i712 | MBG,<br>voucher A0715                     | sect. <i>Balsamea</i>       |
| 93 | <i>A. concolor</i>                              | 5 | 0.41 | i505 | i712 | M,<br>v. K09-00-313<br>Is13-2014          | sect. <i>Grandis</i>        |
| 94 | <i>A. durangensis</i> Martinez                  | 1 | 0.56 | i506 | i712 | Kew,<br>voucher 36849                     | sect. <i>Grandis</i>        |
| 95 | <i>A. guatemalensis</i> Rehder                  | 1 | 0.50 | i507 | i712 | Kew,<br>voucher 7720                      | sect. <i>Grandis</i>        |

|    |                     |   |      |      |      |                       |                        |
|----|---------------------|---|------|------|------|-----------------------|------------------------|
| 96 | <i>A. bracteata</i> | 1 | 0.58 | i508 | i712 | Kew,<br>voucher 36527 | sect. <i>Bracteata</i> |
|----|---------------------|---|------|------|------|-----------------------|------------------------|

<sup>1</sup> Sample No in sequencing experiment. Successfully sequenced indicated in bold.

<sup>2</sup> From Nystedt et al. (2013) (ENA accession no. ERP002568), reference used for mapping.

<sup>3</sup> Taxon sample number.

<sup>4</sup> Geographic coordinates (N/ longitude); Abbreviation of Botanical gardens and arboreta: Kew – Royal Botanical Gardens, Kew; MBG – N.V. Tsitsin Main Botanical Garden of Russian Academy of Sciences (RAS); B – Botanic Gardens of Komarov Botanical Institute RAS; NBG – Nikitsky Botanical Gardens (Yalta); P – Kornik Arboretum; S – Sochi Arboretum; C – Botanical Garden of Charles University (Prague); M – Mustila Arboretum. Sample information (voucher, isolation number) is provided.

<sup>5</sup> Sections are given according to the taxonomic classification of Farjon and Rushforth, 1989.

**Table S2** Position of coding regions on alignment and its representation among samples.

| Gene         | Exon |        |        | Representation among samples, % |
|--------------|------|--------|--------|---------------------------------|
| <i>trnK</i>  |      | 718    | 791    | 85                              |
| <i>cox2</i>  | 3    | 32538  | 32606  | 5                               |
| <i>atp4</i>  |      | 32950  | 33540  | 4                               |
| <i>rps11</i> |      | 38847  | 39359  | 96                              |
| <i>rps2</i>  |      | 43784  | 44452  | 82                              |
| <i>nad7</i>  | 3    | 60080  | 60545  | 96                              |
| <i>nad7</i>  | 4    | 61612  | 61858  | 90                              |
| <i>cob</i>   |      | 64443  | 65636  | 92                              |
| <i>cox2</i>  | 1    | 74488  | 74869  | 100                             |
| <i>rpl2</i>  | 1    | 93478  | 94203  | 97                              |
| <i>cox2</i>  | 2    | 95383  | 95700  | 8                               |
| <i>atp6</i>  |      | 117508 | 118272 | 2                               |
| <i>nad5</i>  | 3    | 135465 | 136948 | 91                              |
| <i>trnD</i>  |      | 156953 | 157026 | 76                              |
| <i>ccmB</i>  |      | 190890 | 191528 | 75                              |
| <i>nad4</i>  | 4    | 207506 | 207594 | 92                              |
| <i>nad4</i>  | 3    | 210012 | 210434 | 92                              |
| <i>nad4</i>  | 2    | 213558 | 214072 | 99                              |
| <i>nad4</i>  | 1    | 230132 | 230593 | 100                             |
| <i>ccmC</i>  |      | 256735 | 257454 | 92                              |
| <i>cox1</i>  |      | 289287 | 290858 | 92                              |
| <i>ccmFn</i> |      | 331184 | 332914 | 95                              |
| <i>nad1</i>  | 4    | 377000 | 377058 | 4                               |
| <i>atp9</i>  |      | 383565 | 383788 | 3                               |
| <i>nad3</i>  |      | 392732 | 393088 | 98                              |
| <i>rps12</i> |      | 393152 | 393529 | 97                              |
| <i>nad2</i>  | 4    | 424016 | 424582 | 98                              |
| <i>nad2</i>  | 3    | 427538 | 427705 | 93                              |
| <i>trnW</i>  |      | 439183 | 439256 | 97                              |
| <i>nad1</i>  | 1    | 448467 | 448857 | 97                              |
| <i>trnE</i>  |      | 470136 | 470207 | 98                              |
| <i>nad2</i>  | 1    | 471429 | 471581 | 97                              |
| <i>nad2</i>  | 2    | 473085 | 473477 | 96                              |
| <i>nad1</i>  | 3    | 499723 | 499915 | 97                              |
| <i>nad1</i>  | 2    | 501643 | 501726 | 4                               |
| <i>atp8</i>  |      | 502342 | 502824 | 99                              |
| <i>rps4</i>  |      | 557462 | 558515 | 99                              |

|              |   |        |        |     |
|--------------|---|--------|--------|-----|
| <i>cox3</i>  |   | 576007 | 576804 | 63  |
| <i>sdh4</i>  |   | 576732 | 577168 | 99  |
| <i>trnY</i>  |   | 593971 | 594053 | 95  |
| <i>trnM</i>  |   | 597086 | 597161 | 96  |
| <i>nad4L</i> |   | 611341 | 611640 | 99  |
| <i>rps13</i> |   | 611963 | 612336 | 100 |
| <i>rps10</i> | 2 | 634212 | 634307 | 93  |
| <i>rps10</i> | 1 | 635971 | 636213 | 97  |
| <i>ccmFc</i> | 1 | 651513 | 652304 | 100 |
| <i>ccmFc</i> | 2 | 653634 | 654206 | 100 |
| <i>rps14</i> |   | 672358 | 672660 | 99  |
| <i>rpl5</i>  |   | 672665 | 673243 | 98  |
| <i>rpl2</i>  | 2 | 684585 | 685308 | 98  |
| <i>rps19</i> |   | 685312 | 685594 | 98  |
| <i>rps3</i>  | 1 | 685598 | 685671 | 100 |
| <i>rps3</i>  | 2 | 687616 | 687808 | 100 |
| <i>rps3</i>  | 3 | 689496 | 690905 | 70  |
| <i>rpl16</i> |   | 690923 | 691336 | 96  |
| <i>trnfM</i> |   | 710965 | 711040 | 99  |
| <i>nad6</i>  |   | 722147 | 722761 | 99  |
| <i>nad9</i>  |   | 729972 | 730562 | 96  |
| <i>rps1</i>  |   | 743910 | 744494 | 97  |
| <i>nad1</i>  | 5 | 809944 | 810203 | 99  |
| <i>matR</i>  |   | 810519 | 812721 | 96  |
| <i>rps7</i>  |   | 813694 | 814281 | 91  |
| <i>nad7</i>  | 2 | 822402 | 822470 | 98  |
| <i>nad7</i>  | 1 | 823412 | 823546 | 95  |
| <i>nad5</i>  | 2 | 837501 | 838733 | 97  |
| <i>nad5</i>  | 1 | 839710 | 839944 | 98  |
| <i>mttB</i>  |   | 848180 | 848929 | 97  |
| <i>rrn18</i> |   | 866570 | 868370 | 97  |
| <i>trnP</i>  |   | 868635 | 868709 | 99  |
| <i>sdh3</i>  |   | 868709 | 869153 | 99  |
| <i>nad7</i>  | 5 | 884431 | 884693 | 97  |
| <i>trnM</i>  |   | 885267 | 885340 | 85  |
| <i>trnQ</i>  |   | 885929 | 886000 | 5   |

**Table S3** Average nucleotide difference (below diagonal) and average proportion of indel differences (above diagonal) among the selected groups of firs.

| Groups |                     |                     |                     |                     |                     |                     |                     |                     |          |
|--------|---------------------|---------------------|---------------------|---------------------|---------------------|---------------------|---------------------|---------------------|----------|
|        | 1                   | 2                   | 3                   | 4                   | 5                   | 6                   | 7                   | 8                   | Outgroup |
| 1      | 0.00054\<br>0.02816 | 0.11888             | 0.12802             | 0.12417             | 0.13403             | 0.18625             | 0.20697             | 0.19123             | 0.53516  |
| 2      | 0.00200             | 0.00082\<br>0.02482 | 0.09468             | 0.08535             | 0.10029             | 0.15677             | 0.18573             | 0.16930             | 0.51669  |
| 3      | 0.00209             | 0.00207             | 0.00040\<br>0.01023 | 0.01853             | 0.09248             | 0.16815             | 0.20375             | 0.18981             | 0.54563  |
| 4      | 0.00190             | 0.00191             | 0.00073             | 0.00012\<br>0.00454 | 0.08568             | 0.16490             | 0.19877             | 0.18195             | 0.55070  |
| 5      | 0.00174             | 0.00189             | 0.00176             | 0.00160             | 0.00010\<br>0.00274 | 0.14015             | 0.15492             | 0.14645             | 0.52748  |
| 6      | 0.00182             | 0.00201             | 0.00199             | 0.00178             | 0.00166             | 0.00015\<br>0.01233 | 0.10870             | 0.10239             | 0.50318  |
| 7      | 0.00190             | 0.00222             | 0.00219             | 0.00205             | 0.00185             | 0.00112             | 0.00026\<br>0.01184 | 0.08601             | 0.51461  |
| 8      | 0.00194             | 0.00227             | 0.00228             | 0.00213             | 0.00188             | 0.00108             | 0.00100             | 0.00082\<br>0.00082 | 0.49791  |

|                                                                                                                                                                                                                                                                                                                                                                                                                                                                                                                                                                                                                                                                                                                                                                                                                                                                                                                                                                                                                                                                                           |         |         |         |         |         |         |         |         |                 |
|-------------------------------------------------------------------------------------------------------------------------------------------------------------------------------------------------------------------------------------------------------------------------------------------------------------------------------------------------------------------------------------------------------------------------------------------------------------------------------------------------------------------------------------------------------------------------------------------------------------------------------------------------------------------------------------------------------------------------------------------------------------------------------------------------------------------------------------------------------------------------------------------------------------------------------------------------------------------------------------------------------------------------------------------------------------------------------------------|---------|---------|---------|---------|---------|---------|---------|---------|-----------------|
|                                                                                                                                                                                                                                                                                                                                                                                                                                                                                                                                                                                                                                                                                                                                                                                                                                                                                                                                                                                                                                                                                           |         |         |         |         |         |         |         | 0.07207 |                 |
| Outgroup                                                                                                                                                                                                                                                                                                                                                                                                                                                                                                                                                                                                                                                                                                                                                                                                                                                                                                                                                                                                                                                                                  | 0.03646 | 0.03695 | 0.04176 | 0.04216 | 0.03924 | 0.03712 | 0.03685 | 0.03619 | 0.01840\0.23915 |
| Groups: 1 <i>A. alba</i> , <i>A. cephalonica</i> , <i>A. nordmanniana</i> , <i>A. pinsapo</i> , <i>A. numidica</i> , <i>A. cilicica</i><br>2 <i>A. spectabilis</i> , <i>A. densa</i> , <i>A. squamata</i> , <i>A. delavayi</i> , <i>A. recurvata</i> (specimen <i>A. recurvata</i> 1), <i>A. pindrow</i> , <i>A. forrestii</i><br>3 <i>A. sibirica</i> , <i>A. semenovii</i> , <i>A. koreana</i> , <i>A. fargesii</i><br>4 <i>A. nephrolepis</i> , <i>A. gracilis</i> , <i>A. recurvata</i> (specimen <i>A. recurvata</i> 2), <i>A. holophylla</i><br>5 <i>A. firma</i> , <i>A. homolepis</i><br>6 <i>A. sachalinensis</i> , <i>A. veitchii</i> , <i>A. homolepis</i> (specimen <i>A. homolepis</i> 4)<br>7 <i>A. lasiocarpa</i> , <i>A. l. var. arizonica</i> , <i>A. balsamea</i> , <i>A. b. var phanerolepis</i> , <i>A. fraseri</i><br>8 <i>A. mariesii</i> , <i>A. bracteata</i> , <i>A. amabilis</i> , <i>A. concolor</i> , <i>A. magnifica</i> , <i>A. grandis</i> , <i>A. religiosa</i> , <i>A. vejarii</i> , <i>A. procera</i> , <i>A. durangensis</i> , <i>A. guatemalensis</i> |         |         |         |         |         |         |         |         |                 |

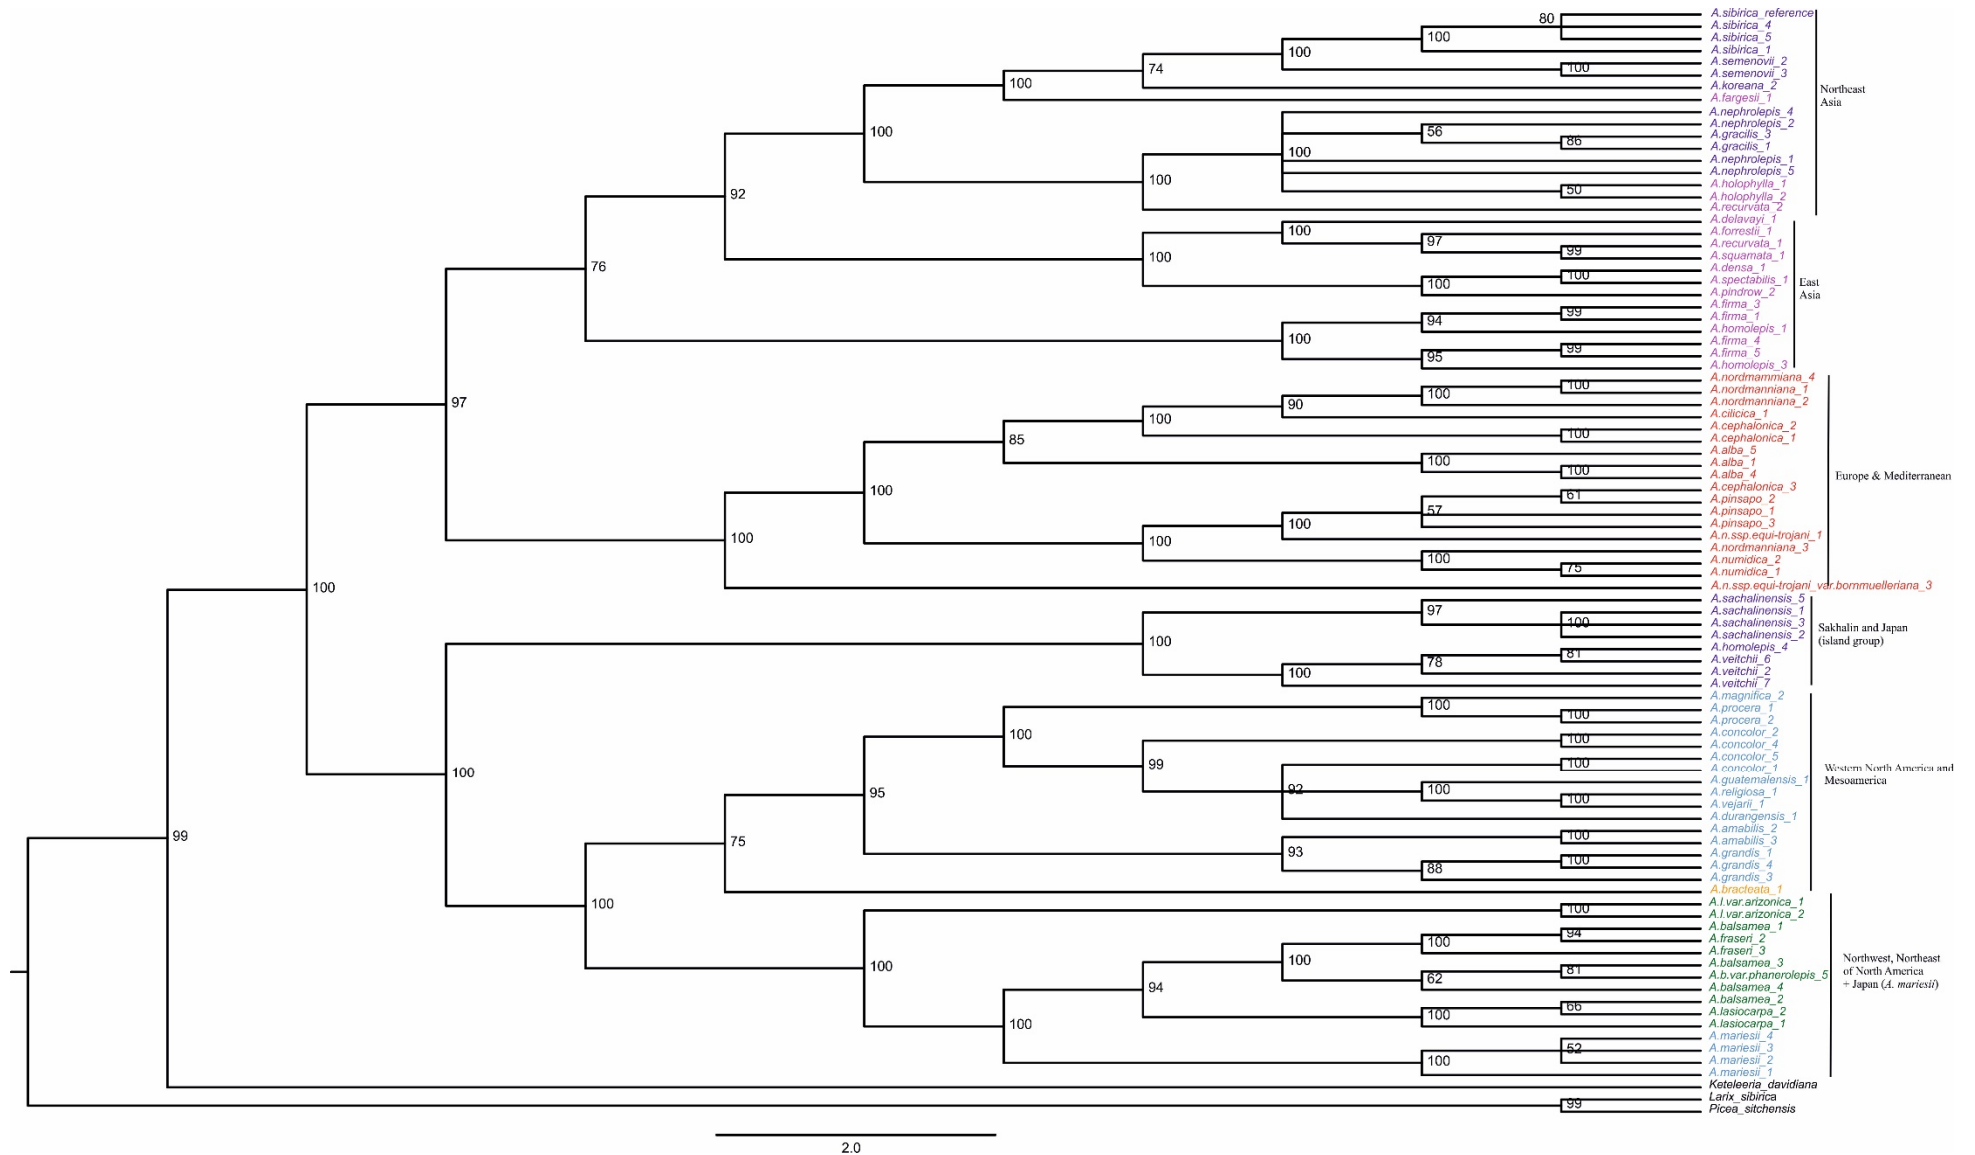

**Figure S1.** Maximum parsimony tree of mitochondrial haplotypes of *Abies*. Node labels represent bootstrap support. The taxon names are colored according to the nDNA-based groups (Fig. 5). Numbers following taxon names refer to taxon sample numbers (Table S1)



## References

Farjon, A., Rushforth, K.D., 1989. A classification of *Abies* Miller. (Pinaceae). Notes Roy. Bot. Gard. Edinburg 46, 59–79.

Nystedt, B.; Street, N.R.; Wetterbom, A.; Zuccolo, A.; Lin, Y.C.; Scofield, D.G.; Vezzi, F.; Delhomme, N.; Giacomello, S.; Alexeyenko, A.; et al. The Norway spruce genome sequence and conifer genome evolution. *Nature* 2013, 497, 579-584, doi:10.1038/nature12211.

Untergasser, A.; Cutcutache, I.; Koressaar, T.; Ye, J.; Faircloth, B.C.; Remm, M.; Rozen, S.G. Primer3-new capabilities and interfaces. *Nucleic Acids Res.* 2012, 40, e115, doi:10.1093/nar/gks596.
